# Supplementary material for: Explainable Risk Prediction of Post-Stroke Adverse Mental Outcomes Using Machine Learning Techniques in a Population of 1780 Patients
Source: MDPI journal article supplement (doi:10.3390/s23187946), 2023-09-17
Supplement: s1 [file s1]

## Supplementary Materials

**Table S1.** List of features collected and used for modelling

| No. | Categories         | Features                                                | Remarks                                                                                                                                                                                                              |
|-----|--------------------|---------------------------------------------------------|----------------------------------------------------------------------------------------------------------------------------------------------------------------------------------------------------------------------|
| 1   | Demographics       | Gender                                                  | <ul style="list-style-type: none"> <li>Features are collected during admission date</li> </ul>                                                                                                                       |
| 2   |                    | Race                                                    |                                                                                                                                                                                                                      |
| 3   |                    | Age at admission                                        |                                                                                                                                                                                                                      |
| 4   |                    | Marital Status                                          |                                                                                                                                                                                                                      |
| 5   |                    | Living Arrangement                                      |                                                                                                                                                                                                                      |
| 6   |                    | History of Depression                                   |                                                                                                                                                                                                                      |
| 7   |                    | Other Psy. History                                      |                                                                                                                                                                                                                      |
| 8   |                    | Family Psy. History                                     |                                                                                                                                                                                                                      |
| 9   |                    | Education Level                                         |                                                                                                                                                                                                                      |
| 10  |                    | Housing Type                                            |                                                                                                                                                                                                                      |
| 11  |                    | Occupation                                              |                                                                                                                                                                                                                      |
| 12  |                    | Alcohol Use                                             |                                                                                                                                                                                                                      |
| 13  |                    | Drug Use                                                |                                                                                                                                                                                                                      |
| 14  |                    | Smoking                                                 |                                                                                                                                                                                                                      |
| 15  | Stroke Information | Stroke Incidence                                        | <ul style="list-style-type: none"> <li>Features are collected during admission date</li> </ul>                                                                                                                       |
| 16  |                    | Stroke Laterality                                       |                                                                                                                                                                                                                      |
| 17  |                    | Nature of Stroke                                        |                                                                                                                                                                                                                      |
| 18  |                    | Structure of Stroke                                     |                                                                                                                                                                                                                      |
| 19  |                    | Stroke Circulation                                      |                                                                                                                                                                                                                      |
| 20  |                    | Type of Stroke                                          |                                                                                                                                                                                                                      |
| 21  | Medication History | Anti-depressants                                        | <ul style="list-style-type: none"> <li>Searched for patient's lab results from 365 days before admission date to 3 days after admission date.</li> </ul>                                                             |
| 22  |                    | Anti-psychotics                                         |                                                                                                                                                                                                                      |
| 23  |                    | Benzodiazepines                                         |                                                                                                                                                                                                                      |
| 24  |                    | Dementia                                                |                                                                                                                                                                                                                      |
| 25  |                    | Mood Stabilizers                                        |                                                                                                                                                                                                                      |
| 26  |                    | Others                                                  |                                                                                                                                                                                                                      |
| 27  | Surgical History   | AVM, aneurysm                                           | <ul style="list-style-type: none"> <li>Searched for patient's lab results from 3 years before admission date to 3 days after admission date.</li> </ul>                                                              |
| 28  |                    | Craniectomy                                             |                                                                                                                                                                                                                      |
| 29  |                    | Craniotomy                                              |                                                                                                                                                                                                                      |
| 30  |                    | Cranioplasty                                            |                                                                                                                                                                                                                      |
| 31  |                    | Others                                                  |                                                                                                                                                                                                                      |
| 32  | Test scores        | Abbreviated Mental Test (AMT)                           | <ul style="list-style-type: none"> <li>Features are collected during admission date</li> </ul>                                                                                                                       |
| 33  |                    | EuroQol 5-Dimensional – Visual Analog Scale (EQ5D-VAS)  |                                                                                                                                                                                                                      |
| 34  |                    | Functional Independence Measure (FIM) – Cognitive Score |                                                                                                                                                                                                                      |
| 35  |                    | FIM – Motor Score                                       |                                                                                                                                                                                                                      |
| 36  | Laboratory Results | Basophils                                               | <ul style="list-style-type: none"> <li>Searched for patient's lab results from 365 days before admission date to 3 days after admission date.</li> <li>Selected the results closest to the admission date</li> </ul> |
| 37  |                    | Creatinine                                              |                                                                                                                                                                                                                      |
| 38  |                    | Eosinophils                                             |                                                                                                                                                                                                                      |
| 39  |                    | Haemoglobin                                             |                                                                                                                                                                                                                      |
| 40  |                    | Lymphocytes                                             |                                                                                                                                                                                                                      |
| 41  |                    | Sodium                                                  |                                                                                                                                                                                                                      |
| 42  |                    | Potassium                                               |                                                                                                                                                                                                                      |
| 43  |                    | Red blood cell count                                    |                                                                                                                                                                                                                      |

|    |                           |                                 |                                                                                                                                                                |
|----|---------------------------|---------------------------------|----------------------------------------------------------------------------------------------------------------------------------------------------------------|
| 44 |                           | Red blood cell width            |                                                                                                                                                                |
| 45 |                           | White blood cell count          |                                                                                                                                                                |
| 46 | Psy. Intervention History | Psy. Intervention Services done | <ul style="list-style-type: none"> <li>Searched for patient's medication records from 3 years before admission date to 3 days after admission date.</li> </ul> |

**Table S2.** Descriptive Statistics of the study cohort

| Features                                        | Total<br>(n = 1,780) |         | PSAMO<br>(n = 285) |         | No PSAMO<br>(n = 1,495) |         | p-value |
|-------------------------------------------------|----------------------|---------|--------------------|---------|-------------------------|---------|---------|
|                                                 | Results              | Missing | Results            | Missing | Results                 | Missing |         |
| Demographics                                    |                      |         |                    |         |                         |         |         |
| Age at admission                                | 61<br>(53 – 70)      | 0       | 60<br>(52 – 68)    | 0       | 61<br>(54 – 70)         | 0       | 0.043*  |
| Gender, male<br>(n, %)                          | 1,105,<br>62.08%     | 0       | 180,<br>63.16%     | 0       | 925,<br>61.87%          | 0       | 0.682   |
| Race, Chinese<br>(n, %)                         | 1413,<br>79.94%      | 0       | 206,<br>72.28%     | 0       | 1217,<br>81.40%         | 0       | 0.002*  |
| Race, Malay<br>(n, %)                           | 219,<br>12.3%        |         | 50,<br>17.54%      |         | 169,<br>11.3%           |         |         |
| Race, Indian<br>(n, %)                          | 137,<br>7.70%        |         | 29,<br>10.18%      |         | 109,<br>7.22%           |         |         |
| Marital Status,<br>Single<br>(n, %)             | 271,<br>15.22%       | 0       | 49,<br>17.19%      | 0       | 222,<br>14.85%          | 0       | 0.501   |
| Marital Status,<br>Married<br>(n, %)            | 1186,<br>66.63%      |         | 189,<br>66.32%     |         | 997,<br>66.69%          |         |         |
| Marital Status,<br>Others<br>(n, %)             | 323,<br>18.15%       |         | 47,<br>16.49%      |         | 276,<br>18.46%          |         |         |
| Living<br>Arrangement,<br>Alone<br>(n, %)       | 119,<br>6.69%        | 0       | 23,<br>8.07%       | 0       | 96,<br>6.42%            | 0       | 0.620   |
| Living<br>Arrangement,<br>With Family<br>(n, %) | 1585,<br>89.04%      |         | 250,<br>87.72%     |         | 1335,<br>89.3%          |         |         |
| Living<br>Arrangement,<br>Others<br>(n, %)      | 76,<br>4.27%         |         | 12,<br>4.21%       |         | 64,<br>4.27%            |         |         |
| History of<br>Depression<br>(n, %)              | 37,<br>2.08%         | 0       | 15,<br>5.26%       | 0       | 22,<br>1.47%            | 0       | <0.001* |
| Other Psy. History<br>(n, %)                    | 25,<br>1.4%          | 0       | 8,<br>2.81%        | 0       | 17,<br>1.14%            | 0       | 0.028*  |
| Family Psy. History<br>(n, %)                   | 23,<br>1.29%         | 0       | 5,<br>1.75%        | 0       | 18,<br>1.20%            | 0       | 0.451   |

|                                                     |              |    |             |    |              |    |         |
|-----------------------------------------------------|--------------|----|-------------|----|--------------|----|---------|
| Education, Primary/No Formal (n, %)                 | 751, 42.19%  | 0  | 108, 37.89% | 0  | 643, 43.01%  | 0  | 0.446   |
| Education, Secondary (n, %)                         | 685, 38.48%  |    | 119, 41.75% |    | 566, 37.86%  |    |         |
| Education, Diploma (n, %)                           | 218, 12.25%  |    | 36, 12.63%  |    | 182, 12.17%  |    |         |
| Education, Degree or Higher (n, %)                  | 126, 7.08%   |    | 22, 7.72%   |    | 104, 6.96%   |    |         |
| Housing Type, Rental/Dorms (n, %)                   | 260, 14.61%  | 80 | 41, 14.39%  | 22 | 219, 14.65%  | 58 | 0.038*  |
| Housing Type, HDB (non-rental) (n, %)               | 1270, 71.35% |    | 194, 68.07% |    | 1076, 71.97% |    |         |
| Housing Type, Private (n, %)                        | 170, 9.55%   |    | 28, 9.82%   |    | 142, 9.5%    |    |         |
| Household income, No Income (n, %)                  | 1228, 68.99% | 0  | 243, 85.26% | 0  | 985, 65.89%  | 0  | <0.001* |
| Household income (monthly), <\$1000 (n, %)          | 64, 3.6%     |    | 8, 2.81%    |    | 56, 3.75%    |    |         |
| Household income (monthly), \$1000 - \$3000 (n, %)  | 297, 16.69%  |    | 22, 7.72%   |    | 275, 18.43%  |    |         |
| Household income (monthly), \$3001 - \$5000 (n, %)  | 95, 5.34%    |    | 6, 2.11%    |    | 89, 5.95%    |    |         |
| Household income (monthly), \$5001 and above (n, %) | 96, 5.39%    |    | 6, 2.11%    |    | 90, 6.02%    |    |         |
| Occupation, Not Working (n, %)                      | 803, 45.11%  | 34 | 127, 44.56% | 1  | 676, 45.22%  | 33 | 0.181   |
| Occupation, Unskilled (n, %)                        | 371, 20.84%  |    | 59, 20.7%   |    | 312, 20.87%  |    |         |
| Occupation, Skilled (n, %)                          | 572, 32.13%  |    | 98, 34.39%  |    | 474, 31.71%  |    |         |
| Alcohol Use, Non-drinker (n, %)                     | 1497, 84.1%  | 93 | 231, 81.05% | 22 | 1266, 84.68% | 71 | 0.171   |
| Alcohol Use, Ex-drinker                             | 139, 7.81%   |    | 25, 8.77%   |    | 114, 7.63%   |    |         |

|                                         |              |     |             |    |              |     |         |
|-----------------------------------------|--------------|-----|-------------|----|--------------|-----|---------|
| (n, %)                                  |              |     |             |    |              |     |         |
| Alcohol Use, Drinker (n, %)             | 51, 2.87%    |     | 7, 2.46%    |    | 44, 2.94%    |     |         |
| Drug Abuse, Yes (n, %)                  | 2, 0.14%     | 0   | 0, 0%       | 0  | 2, 0.16%     | 0   | 0.005*  |
| Smoking Use, Non-smoker (n, %)          | 1179, 66.24% | 174 | 178, 62.46% | 32 | 1001, 66.96% | 142 | 0.286   |
| Alcohol Use, Ex-smoker (n, %)           | 329, 18.48%  |     | 62, 21.75%  |    | 267, 17.86%  |     |         |
| Alcohol Use, Smoker (n, %)              | 98, 5.51%    |     | 13, 4.56%   |    | 85, 5.69%    |     |         |
| Stroke Information                      |              |     |             |    |              |     |         |
| Stroke Incidence, First (n, %)          | 894, 50.22%  | 0   | 140, 49.12% | 0  | 754, 50.43%  | 0   | 0.011   |
| Stroke Incidence, First Clinical (n, %) | 572, 32.13%  |     | 72, 27.37%  |    | 494, 33.04%  |     |         |
| Stroke Incidence, Recurrent (n, %)      | 314, 17.64%  |     | 67, 23.51%  |    | 247, 16.52%  |     |         |
| Stroke Laterality, Left (n, %)          | 663, 37.25%  | 0   | 81, 28.42%  | 0  | 582, 38.93%  | 0   | <0.001* |
| Stroke Laterality, Right (n, %)         | 1000, 56.18% |     | 176, 61.75% |    | 824, 55.12%  |     |         |
| Stroke Laterality, Bilateral (n, %)     | 117, 6.57%   |     | 28, 9.82%   |    | 89, 5.95%    |     |         |
| Stroke Nature, Ischemic or Both (n, %)  | 1290, 72.47% | 0   | 192, 67.37% | 0  | 1098, 73.44% | 0   | 0.042*  |
| Stroke Nature, Haemorrhagic (n, %)      | 490, 27.53%  |     | 93, 32.63%  |    | 397, 26.56%  |     |         |
| Stroke Structure, Basal Ganglia (n, %)  | 415, 23.31%  | 0   | 74, 25.96%  | 0  | 341, 22.81%  | 0   | 0.271   |
| Stroke Structure, Thalamus (n, %)       | 162, 9.1%    |     | 30, 10.53%  |    | 132, 8.83%   |     |         |
| Stroke Structure, Others (n, %)         | 1203, 67.63% |     | 181, 63.51% |    | 1023, 68.43% |     |         |
| Stroke Circulation, Anterior (n, %)     | 1095, 61.52% | 0   | 184, 64.56% | 0  | 911, 60.94%  | 0   | 0.504   |
| Stroke Circulation, Posterior (n, %)    | 620, 34.83%  |     | 92, 32.28%  |    | 528, 35.32%  |     |         |

|                                          |                    |     |                    |    |                    |     |         |
|------------------------------------------|--------------------|-----|--------------------|----|--------------------|-----|---------|
| Stroke Circulation, Both (n, %)          | 65, 3.65%          |     | 9, 3.16%           |    | 56, 3.75%          |     |         |
| Stroke Type, Small Vessel Disease (n, %) | 1381, 77.58%       | 0   | 208, 72.98%        | 0  | 1173, 78.46%       | 0   | 0.099   |
| Stroke Type, Large Vessel Disease (n, %) | 241, 13.54%        |     | 49, 17.19%         |    | 192, 12.84%        |     |         |
| Stroke Type, Others (n, %)               | 158, 8.88%         |     | 28, 9.82%          |    | 130, 8.70%         |     |         |
| Medication History (Last 1 year)         |                    |     |                    |    |                    |     |         |
| Anti-depressants (n, %)                  | 261, 14.66%        | 0   | 57, 20%            | 0  | 204, 13.65%        | 0   | 0.005*  |
| Anti-psychotics (n, %)                   | 34, 1.91%          | 0   | 11, 3.86%          | 0  | 23, 1.54%          | 0   | 0.009*  |
| Benzodiazepines (n, %)                   | 51, 2.87%          | 0   | 14, 4.91%          | 0  | 37, 2.47%          | 0   | 0.024*  |
| Dementia meds (n, %)                     | 10, 0.56%          | 0   | 4, 1.4%            | 0  | 6, 0.4%            | 0   | 0.038*  |
| Mood Stabilizers (n, %)                  | 2, 0.11%           | 0   | 0, 0%              | 0  | 2, 0.13%           | 0   | 0.537   |
| Others (n, %)                            | 138, 7.75%         | 0   | 31, 10.88%         | 0  | 107, 7.16%         | 0   | 0.031*  |
| Surgical History (Last 3 Years)          |                    |     |                    |    |                    |     |         |
| AVM, aneurysm (n, %)                     | 25, 1.40%          | 0   | 7, 2.46%           | 0  | 18, 1.2%           | 0   | 0.611   |
| Craniectomy (n, %)                       | 16, 0.9%           | 0   | 6, 2.11%           | 0  | 10, 0.67%          | 0   | 0.100   |
| Craniotomy (n, %)                        | 10, 0.65%          | 0   | 2, 0.7%            | 0  | 8, 0.54%           | 0   | 0.019*  |
| Cranioplasty (n, %)                      | 0, 0%              | 0   | 0, 0%              | 0  | 0, 0%              | 0   | -       |
| Others (n, %)                            | 35, 1.97%          | 0   | 4, 1.4%            | 0  | 31, 2.07%          | 0   | 0.455   |
| FIM/EQ5D and other Tests                 |                    |     |                    |    |                    |     |         |
| AMT                                      | 9 (8 – 10)         | 86  | 9 (8 – 10)         | 25 | 9 (8 – 10)         | 61  | <0.001* |
| EQ5D-VAS                                 | 60 (50 – 80)       | 223 | 50 (40 – 70)       | 52 | 60 (50 – 80)       | 171 | <0.001* |
| FIM – Cognitive Score                    | 28 (21 – 33)       | 1   | 23 (16 – 30)       | 1  | 28 (21 – 33)       | 0   | <0.001* |
| FIM – Motor Score                        | 46 (32 – 57)       | 1   | 33 (23 – 49)       | 0  | 47 (35 – 58)       | 1   | <0.001* |
| Laboratory Parameters                    |                    |     |                    |    |                    |     |         |
| Basophils                                | 0.04 (0.02 – 0.05) | 319 | 0.04 (0.03 – 0.06) | 36 | 0.04 (0.02 – 0.05) | 283 | <0.001* |
| Haemoglobin                              | 13.4 (12.3 – 14.5) | 319 | 13.4 (12.2 – 14.5) | 36 | 13.3 (12.3 – 14.4) | 283 | 0.715   |
| Creatinine                               | 75 (61 – 93)       | 303 | 78 (62 – 97)       | 32 | 75 (60 – 93)       | 271 | 0.116   |
| Eosinophils                              | 0.16               | 319 | 0.17               | 36 | 0.16               | 283 | 0.168   |

|                                                 |                       |     |                       |    |                       |     |        |
|-------------------------------------------------|-----------------------|-----|-----------------------|----|-----------------------|-----|--------|
|                                                 | (0.08 – 0.27)         |     | (0.09 – 0.28)         |    | (0.08 – 0.27)         |     |        |
| <b>Potassium</b>                                | 3.8<br>(3.6 – 4.1)    | 304 | 3.7<br>(3.5 – 4.1)    | 32 | 3.8<br>(3.6 – 4.1)    | 272 | 0.006* |
| <b>Lymphocytes</b>                              | 1.67<br>(1.27 – 2.19) | 319 | 1.73<br>(1.33 – 2.26) | 36 | 1.66<br>(1.26 – 2.17) | 283 | 0.287  |
| <b>Red Blood Count<br/>Mean (SD)</b>            | 4.5<br>(0.65)         | 319 | 4.54<br>(0.66)        | 36 | 4.49<br>(0.65)        | 283 | 0.456  |
| <b>Red<br/>Cell Distribution<br/>Width</b>      | 13.8<br>(13.2 - 14.6) | 319 | 13.9<br>(13.4 – 14.7) | 36 | 13.7<br>(13.2 - 14.6) | 283 | 0.021* |
| <b>Sodium</b>                                   | 138<br>(136 – 140)    | 304 | 138<br>(136 – 140)    | 32 | 138<br>(136 – 140)    | 272 | 0.090  |
| <b>White Blood Cells</b>                        | 8.4<br>(6.8 – 10.2)   | 319 | 8.7<br>(7 – 11.3)     | 36 | 8.3<br>(6.8 – 10.13)  | 283 | 0.009* |
| <b>Psy. Intervention History (Last 3 years)</b> |                       |     |                       |    |                       |     |        |
| <b>Psy Intervention<br/>Services<br/>(n, %)</b> | 107,<br>6.01%         | 0   | 19,<br>6.67%          | 0  | 88,<br>5.89%          | 0   | 0.611  |

*All figures are in median (IQR) unless specified*

*\*Statistically significant at  $\alpha = 0.05$*
